# Supplementary material for: A zinc ion yarn battery with high capacity and fire retardancy based on a SiO2 nanoparticle doped ionogel electrolyte
Source: Royal Society of Chemistry journal article supplement (doi:10.1039/d0sm00996b), 2020-01-01
Supplement: d0sm00996b1.pdf [file d0sm00996b1.pdf]

**A zinc ion yarn battery with high capacity and fire retardancy based on SiO<sub>2</sub> nanoparticles  
doped ionogel electrolyte**

Jie Liu<sup>† a,b</sup>, Ningyuan Nie<sup>† a,b</sup>, Hua Wang<sup>a,b</sup>, Zhe Chen<sup>a,b</sup>, Zhenyuan Ji<sup>a,b</sup>, Xinfeng Duan<sup>c</sup> and

Yan Huang<sup>\* a,b,d</sup>

Corresponding E-mail: yanhuanglib@hit.edu.cn (Y. Huang)

---

**List of Contents**

**Supplementary Figures:**

**Figure S1.** Comparison of the ionic conductivity of the ionogel in this work with the values reported by other literatures.

**Figure S2.** XRD patterns for the electrodeposited Zn nanosheets and peaks of standard PDF card.

**Figure S3.** a, An XPS full spectrum of MnO<sub>2</sub> interconnected nanosheets. b, High-resolution spectrum of Mn 2p. c, High-resolution spectrum of Mn 3s. d, High-resolution spectrum of O 1s.

**Table S1.** Comparison of our battery with previously reported flexible batteries in terms of capacity, energy density and power density.

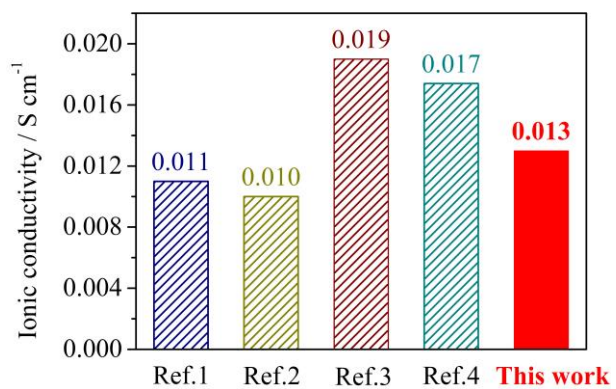

**Figure S1.** Comparison of the ionic conductivity of the ionogel in this work with the values reported by other literatures.

The ionic conductivity of the ionogel in this work is comparable to the value of [Emim][DCA]-based ionogels reported by other literatures.<sup>1-4</sup>

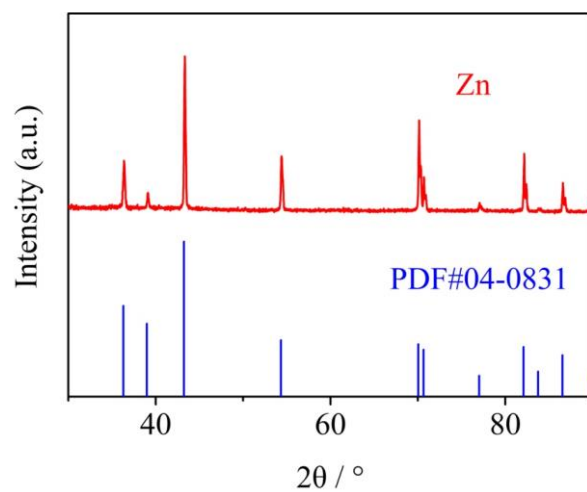

**Figure S2.** XRD patterns for the electrodeposited Zn nanosheets and peaks of standard PDF card.

The XRD pattern of electrodeposited Zn can be matched well with standard PDF card (PDF#04-0831).

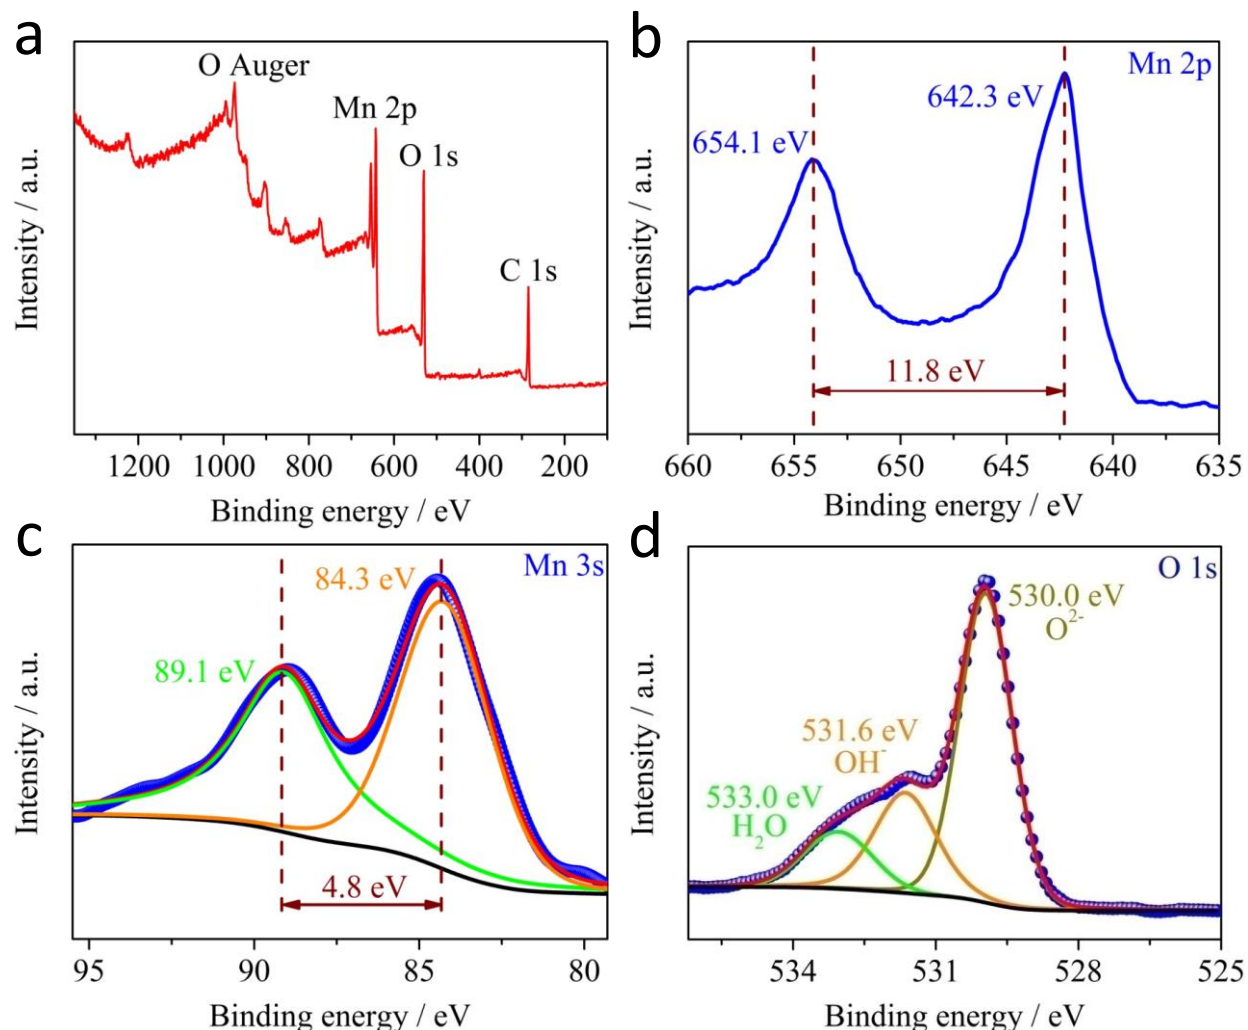

**Figure S3.** a, An XPS full spectrum of MnO<sub>2</sub> interconnected nanosheets. b, High-resolution spectrum of Mn 2p. c, High-resolution spectrum of Mn 3s. d, High-resolution spectrum of O 1s.

The full spectrum of electrodeposited materials indicates that it consists of O and Mn elements. In the XPS spectrum of Mn 2p, two peaks located at the binding energy (BE) of 642.3 and 654.1 eV with a spin-energy separation of 11.8 eV are in good agreement with Mn 2p<sub>3/2</sub> and Mn 2p<sub>1/2</sub> spin-orbit peaks in previous reports on MnO<sub>2</sub>.<sup>5, 6</sup> The  $\Delta E$  value of 4.9 eV in Mn 3s spectrum indicates that the average Mn valence state is 3.7.<sup>7</sup> The difference of this valence from 4 is due to the defects created in electrodeposition process.<sup>8</sup> The O 1s spectrum is fitted by three peaks located

at binding energy of 530.0, 531.6 and 533.0 eV, representing  $O^{2-}$  component,  $OH^-$  component and the structural or physisorbed water, respectively.<sup>9</sup>

**Table S1.** Comparison of our battery with previously reported flexible batteries in terms of capacity, energy density and power density.

| Ref.             | Active materials                                                                           | Capacity<br>(mAh g <sup>-1</sup> ) | Energy density<br>(Wh kg <sup>-1</sup> ) | Power density<br>(W kg <sup>-1</sup> ) |
|------------------|--------------------------------------------------------------------------------------------|------------------------------------|------------------------------------------|----------------------------------------|
| <b>This work</b> | <b>Zn//MnO<sub>2</sub></b>                                                                 | <b>277</b>                         | <b>283</b>                               | <b>100</b>                             |
| 10               | CC-CF@Fe <sub>3</sub> O <sub>4</sub> //CC-CF@NiO                                           | 207.6                              | 94.5                                     | 1200                                   |
| 11               | CNT/LiMn <sub>2</sub> O <sub>4</sub> //Si/CNT                                              | 106.5                              | 242                                      | -                                      |
| 12               | CNT/LiMn <sub>2</sub> O <sub>4</sub> //CNT/Li <sub>4</sub> Ti <sub>5</sub> O <sub>12</sub> | 138                                | 27                                       | 880                                    |
| 13               | Zn//MoS <sub>2</sub>                                                                       | 202.6                              | 148.2                                    | 70.5                                   |
| 14               | Zn//PANI                                                                                   | 151                                | 67.8                                     | 3340                                   |
| 15               | Zn//RGO/VO <sub>2</sub>                                                                    | 194                                | 65                                       | 7800                                   |
| 16               | Zn//Zn <sub>2</sub> (OH)VO <sub>4</sub>                                                    | 204                                | 115                                      | 5100                                   |

## Supplementary References

1. A. F. De Anastro, N. Casado, X. E. Wang, J. Rehmen, D. Evans, D. Mecerreyes, M. Forsyth and C. Pozo-Gonzalo, *Electrochim. Acta*, 2018, **278**, 271-278.
2. Y. Ding, J. J. Zhang, L. Chang, X. Q. Zhang, H. L. Liu and L. Jiang, *Adv. Mater.*, 2017, **29**, 1704253.
3. M. A. Susan, T. Kaneko, A. Noda and M. Watanabe, *J. Am. Chem. Soc.*, 2005, **127**, 4976-4983.
4. M. D. Green, D. Wang, S. T. Hemp, J. H. Choi, K. I. Winey, J. R. Heflin and T. E. Long, *Polymer*, 2012, **53**, 3677-3686.
5. A. L. M. Reddy, M. M. Shaijumon, S. R. Gowda and P. M. Ajayan, *Nano Lett.*, 2009, **9**, 1002-1006.
6. L. H. Du, P. H. Yang, X. Yu, P. Y. Liu, J. H. Song and W. J. Mai, *J Mater Chem A*, 2014, **2**, 17561-17567.
7. M. Toupin, T. Brousse and D. Belanger, *Chem. Mater.*, 2002, **14**, 3946-3952.
8. Z. H. Huang, Y. Song, D. Y. Feng, Z. Sun, X. Q. Sun and X. X. Liu, *ACS Nano*, 2018, **12**, 3557-3567.
9. M. Toupin, T. Brousse and D. Belanger, *Chem. Mater.*, 2004, **16**, 3184-3190.
10. C. Guan, W. Zhao, Y. T. Hu, Q. Q. Ke, X. Li, H. Zhang and J. Wang, *Adv. Energy Mater.*, 2016, **6**, 1601034.
11. W. Weng, Q. Sun, Y. Zhang, H. J. Lin, J. Ren, X. Lu, M. Wang and H. S. Peng, *Nano Lett.*, 2014, **14**, 3432-3438.
12. J. Ren, Y. Zhang, W. Y. Bai, X. L. Chen, Z. T. Zhang, X. Fang, W. Weng, Y. G. Wang and H. S. Peng, *Angew. Chem. Int. Edit.*, 2014, **53**, 7864-7869.
13. H. F. Li, Q. Yang, F. N. Mo, G. J. Liang, Z. X. Liu, Z. J. Tang, L. T. Ma, J. Liu, Z. C. Shi and C. Y. Zhi, *Energy Storage Mater.*, 2019, **19**, 94-101.
14. Y. Ma, X. L. Xie, R. H. Lv, B. Na, J. B. Ouyang and H. S. Liu, *ACS Sustain. Chem. Eng.*, 2018, **6**, 8697-8703.
15. X. Dai, F. Wan, L. L. Zhang, H. M. Cao and Z. Q. Niu, *Energy Storage Mater.*, 2019, **17**, 143-150.
16. D. L. Chao, C. Zhu, M. Song, P. Liang, X. Zhang, N. H. Tiep, H. F. Zhao, J. Wang, R. M. Wang, H. Zhang and H. J. Fan, *Adv. Mater.*, 2018, **30**, 1803181.
